# Supplementary material for: Oral Selumetinib Does Not Negatively Impact Photoreceptor Survival in Murine Experimental Retinal Detachment
Source: PubMed Central journal article supplement — Invest Ophthalmol Vis Sci. 2019 Jan;60(1):349–57. doi: 10.1167/iovs.18-25405 (PMC6348998; doi:10.1167/iovs.18-25405), 2019-01
Supplement: iovs-59-15-31_s01.pdf [file iovs-59-15-31_s01.pdf]

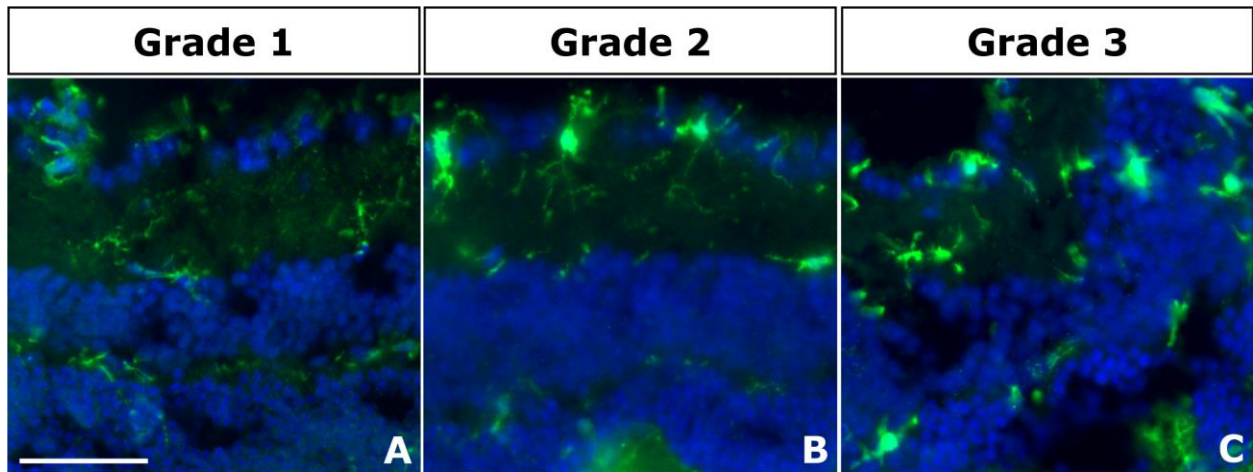

**Fig. S1**

Iba-1 immunofluorescence in mice retina was graded based on percentage of microglia with amoeboid characteristics. Images with amoeboid-shaped microglia, without long thin processes, were given a grade of (A) 1 = predominantly spindle (0-<20% amoeboid Iba-1+ cells), (B) 2 = mixed (20-<35% amoeboid Iba-1+ cells), (C) 3= predominantly amoeboid ( $\geq 35\%$  amoeboid Iba-1+ cells). Scale bar denotes 50 microns.
